# Supplementary material for: Caught in a trap: DNA contamination in tsetse xenomonitoring can lead to over-estimates of Trypanosoma brucei infection
Source: PubMed Central journal article supplement (PMC11341098; doi:10.1371/journal.pntd.0012095), 2024-08-12
Supplement: pntd.0012095.s001.pdf [file pntd.0012095.s001.pdf]

| Treatment | Replicate | Infected |   |          | Uninfected |   |          |
|-----------|-----------|----------|---|----------|------------|---|----------|
|           |           | M        | F | Total IF | M          | F | Total UF |
| T1        | A         | 1        | 8 | 9        | 2          | 1 | 3        |
|           | B         | 4        | 5 | 9        | 2          | 1 | 3        |
|           | C         | 4        | 5 | 9        | 2          | 1 | 3        |
| T2        | A         | 4        | 2 | 6        | 2          | 4 | 6        |
|           | B         | 4        | 2 | 6        | 2          | 4 | 6        |
|           | C         | 4        | 2 | 6        | 2          | 4 | 6        |
| T3        | A         | 1        | 0 | 1        | 5          | 6 | 11       |
|           | B         | 1        | 0 | 1        | 5          | 6 | 11       |
|           | C         | 1        | 0 | 1        | 5          | 6 | 11       |
| C0        | A         | 0        | 0 | 0        | 5          | 7 | 12       |
|           | B         | 0        | 0 | 0        | 6          | 6 | 12       |
|           | C         | 0        | 0 | 0        | 6          | 6 | 12       |

**S1 Table: A table displaying *G. m. morsitans* sex and infection ratios for trap cage experiments.**  
M = male, F = female, IF = infected fly, UF = naïve uninfected fly.
