# Supplementary material for: Caught in a trap: DNA contamination in tsetse xenomonitoring can lead to over-estimates of Trypanosoma brucei infection
Source: PubMed Central journal article supplement (PMC11341098; doi:10.1371/journal.pntd.0012095), 2024-08-12
Supplement: pntd.0012095.s002.pdf [file pntd.0012095.s002.pdf]

| Trap ID | Transect | Region       | Latitude | Longitude |
|---------|----------|--------------|----------|-----------|
| TA-1    | TA       | Tarangire NP | 157791.8 | -432982   |
| TA-2    | TA       | Tarangire NP | 157758.3 | -433093   |
| TA-3    | TA       | Tarangire NP | 160220.6 | -433927   |
| TA-4    | TA       | Tarangire NP | 160390.8 | -434067   |
| TA-5    | TA       | Tarangire NP | 162344   | -435548   |
| TA-6    | TA       | Tarangire NP | 162421.2 | -435634   |
| TA-7    | TA       | Tarangire NP | 166310.1 | -439209   |
| TA-8    | TA       | Tarangire NP | 166425.8 | -439176   |
| TA-9    | TA       | Tarangire NP | 169880.1 | -440627   |
| TA-10   | TA       | Tarangire NP | 169987.6 | -440676   |
| TA-11   | TA       | Tarangire NP | 175093   | -440977   |
| TA-12   | TA       | Tarangire NP | 175332.8 | -441007   |
| TA-13   | TA       | Tarangire NP | 177523   | -444401   |
| TA-14   | TA       | Tarangire NP | 177595.1 | -444307   |
| TA-15   | TA       | Tarangire NP | 180261.1 | -447310   |
| TA-16   | TA       | Tarangire NP | 180260.7 | -446981   |
| TB-1    | TB       | Tarangire NP | 183902.2 | -453155   |
| TB-2    | TB       | Tarangire NP | 183768.1 | -453218   |
| TB-3    | TB       | Tarangire NP | 182148.9 | -452704   |
| TB-4    | TB       | Tarangire NP | 182112.8 | -452564   |
| TB-5    | TB       | Tarangire NP | 179855.6 | -452141   |
| TB-6    | TB       | Tarangire NP | 179708.8 | -452127   |
| TB-7    | TB       | Tarangire NP | 177981.8 | -450880   |
| TB-8    | TB       | Tarangire NP | 177902.2 | -450792   |
| TB-9    | TB       | Tarangire NP | 176262.9 | -449731   |
| TB-10   | TB       | Tarangire NP | 176173.9 | -449653   |
| TB-11   | TB       | Tarangire NP | 176600   | -446489   |
| TB-12   | TB       | Tarangire NP | 176705.1 | -446403   |
| TB-13   | TB       | Tarangire NP | 174817.8 | -444388   |
| TB-14   | TB       | Tarangire NP | 174923.5 | -444350   |
| TB-15   | TB       | Tarangire NP | 177013.3 | -438641   |
| TB-16   | TB       | Tarangire NP | 177137.6 | -438599   |
| TB-17   | TB       | Tarangire NP | 175713.3 | -436707   |
| TB-18   | TB       | Tarangire NP | 175797.3 | -433914   |
| TB-19   | TB       | Tarangire NP | 175752.6 | -433802   |
| TC-1    | TC       | Tarangire NP | 173251   | -421652   |
| TC-2    | TC       | Tarangire NP | 173220.6 | -421768   |
| TC-3    | TC       | Tarangire NP | 174119.1 | -424909   |
| TC-4    | TC       | Tarangire NP | 174101.6 | -425026   |
| TC-5    | TC       | Tarangire NP | 174093.3 | -427756   |
| TC-6    | TC       | Tarangire NP | 174194   | -427822   |
| TC-7    | TC       | Tarangire NP | 176538.1 | -429781   |
| TC-8    | TC       | Tarangire NP | 176646.3 | -429786   |
| TC-9    | TC       | Tarangire NP | 179625.5 | -429866   |
| TC-10   | TC       | Tarangire NP | 179737.1 | -429824   |
| TC-11   | TC       | Tarangire NP | 181196.1 | -430670   |
| TC-12   | TC       | Tarangire NP | 181276.2 | -430743   |
| TC-13   | TC       | Tarangire NP | 185134.2 | -432707   |
| TC-14   | TC       | Tarangire NP | 185208.6 | -432647   |
| TC-15   | TC       | Tarangire NP | 185478.8 | -430603   |
| TC-16   | TC       | Tarangire NP | 185353.4 | -430546   |
| BA-1    | BA       | Lobosoiret   | 196443.2 | -474089   |
| BA-2    | BA       | Lobosoiret   | 196540.9 | -474048   |
| BA-3    | BA       | Lobosoiret   | 198862.3 | -475777   |
| BA-4    | BA       | Lobosoiret   | 198961.9 | -475856   |
| BA-5    | BA       | Lobosoiret   | 201891.1 | -476718   |
| BA-6    | BA       | Lobosoiret   | 201973.1 | -476656   |
| BA-7    | BA       | Lobosoiret   | 204397.6 | -476615   |
| BA-8    | BA       | Lobosoiret   | 204495.8 | -476564   |
| BA-9    | BA       | Lobosoiret   | 206114.6 | -475525   |
| BA-10   | BA       | Lobosoiret   | 206145.5 | -475429   |
| BA-11   | BA       | Lobosoiret   | 201296   | -496248   |
| BA-12   | BA       | Lobosoiret   | 201393.9 | -496203   |
| BA-13   | BA       | Lobosoiret   | 204968   | -492717   |
| BA-14   | BA       | Lobosoiret   | 205045.9 | -492630   |
| BA-15   | BA       | Lobosoiret   | 206585.7 | -489703   |
| BA-16   | BA       | Lobosoiret   | 206612.1 | -489587   |
| BA-17   | BA       | Lobosoiret   | 207077   | -487013   |
| BA-18   | BA       | Lobosoiret   | 207040.6 | -486886   |
| BA-19   | BA       | Lobosoiret   | 207231.9 | -482912   |
| BA-20   | BA       | Lobosoiret   | 207254.5 | -482776   |
| BB-1    | BB       | Kimotorok    | 215096.5 | -441900   |
| BB-2    | BB       | Kimotorok    | 215074.3 | -442017   |
| BB-3    | BB       | Kimotorok    | 214548.5 | -446742   |
| BB-4    | BB       | Kimotorok    | 214556.6 | -446849   |
| BB-5    | BB       | Kimotorok    | 215311.5 | -451567   |
| BB-6    | BB       | Kimotorok    | 215371.5 | -451687   |
| BB-7    | BB       | Kimotorok    | 216877   | -455466   |
| BB-8    | BB       | Kimotorok    | 216897   | -455571   |
| BB-9    | BB       | Kimotorok    | 218574.7 | -459906   |
| BB-10   | BB       | Kimotorok    | 218591.7 | -460021   |
| BB-11   | BB       | Kimotorok    | 219323.5 | -469269   |
| BB-12   | BB       | Kimotorok    | 219236.6 | -469328   |
| BB-13   | BB       | Kimotorok    | 215354   | -470747   |
| BB-14   | BB       | Kimotorok    | 215238.1 | -470780   |
| BB-15   | BB       | Kimotorok    | 209051.2 | -474730   |
| BB-16   | BB       | Kimotorok    | 209059.9 | -474853   |
| BB-17   | BB       | Kimotorok    | 208837.6 | -478110   |
| BB-18   | BB       | Kimotorok    | 208833.1 | -478251   |

**S2 Table: A table displaying transect, region and coordinates for each Nzi trap set as part of the study. Tarangire NP = Tarangire National Park.**
