# Supplementary material for: Caught in a trap: DNA contamination in tsetse xenomonitoring can lead to over-estimates of Trypanosoma brucei infection
Source: PubMed Central journal article supplement (PMC11341098; doi:10.1371/journal.pntd.0012095), 2024-08-12
Supplement: pntd.0012095.s003.pdf [file pntd.0012095.s003.pdf]

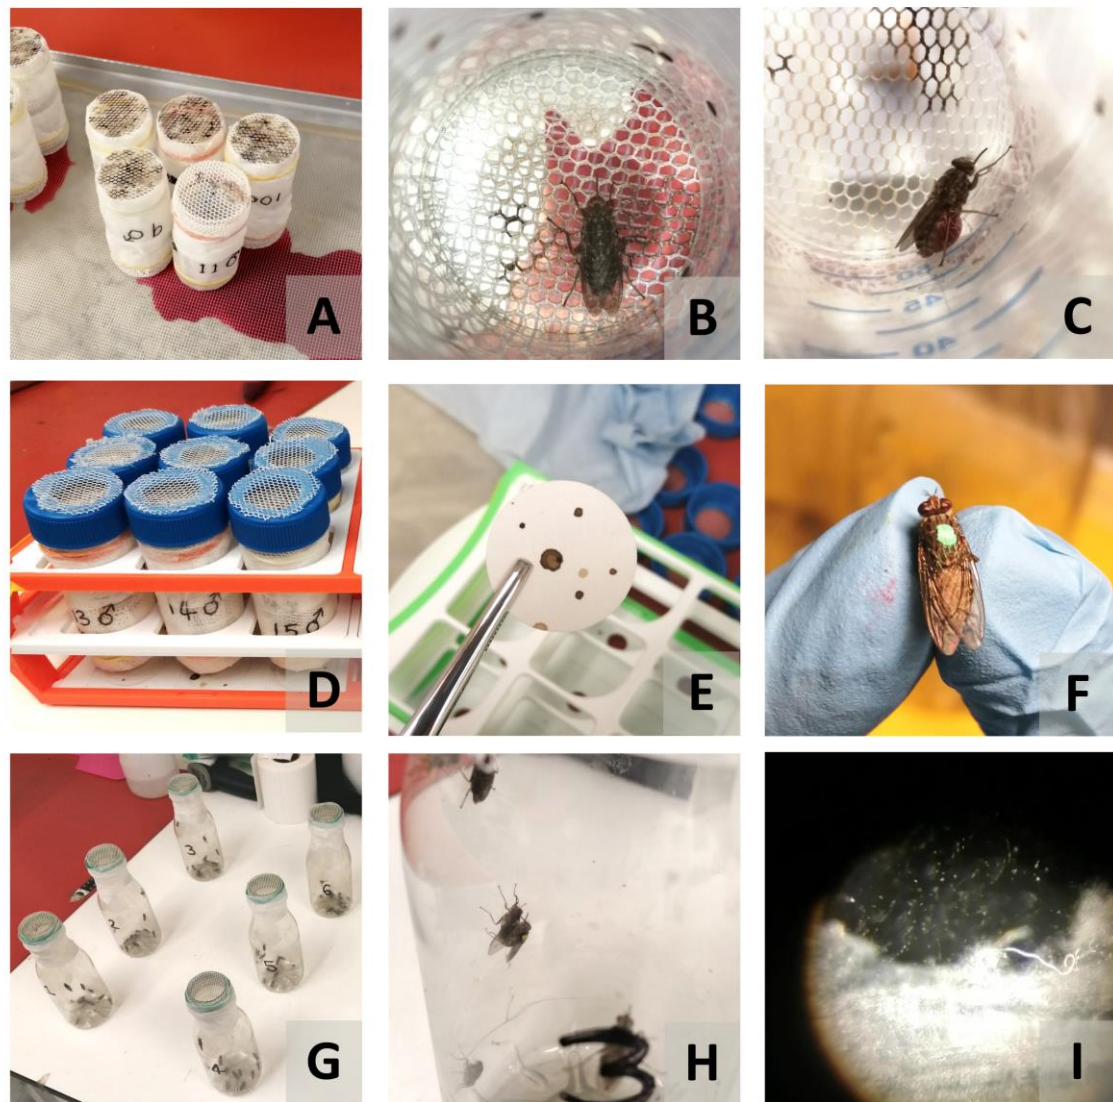

**S1 Fig: Images from experiments conducted on insectary-reared tsetse.** (A) and (B) show tsetse being blood-fed in solitary cells; (C) tsetse resting after bloodmeal; (D) tsetse solitary cells suspended above filter paper discs in rack; (E) collection of tsetse faecal samples on filter paper; (F) an infected tsetse marked with green oil paint; (G) experiment trap cages; (H) two infected tsetse (fly IDs 87 and 109) copulating inside trap cage during experiment; (I) dissected tsetse midgut infected with *T. brucei* as viewed under a microscope (400X).
