# Supplementary material for: Caught in a trap: DNA contamination in tsetse xenomonitoring can lead to over-estimates of Trypanosoma brucei infection
Source: PubMed Central journal article supplement (PMC11341098; doi:10.1371/journal.pntd.0012095), 2024-08-12
Supplement: pntd.0012095.s004.pdf [file pntd.0012095.s004.pdf]

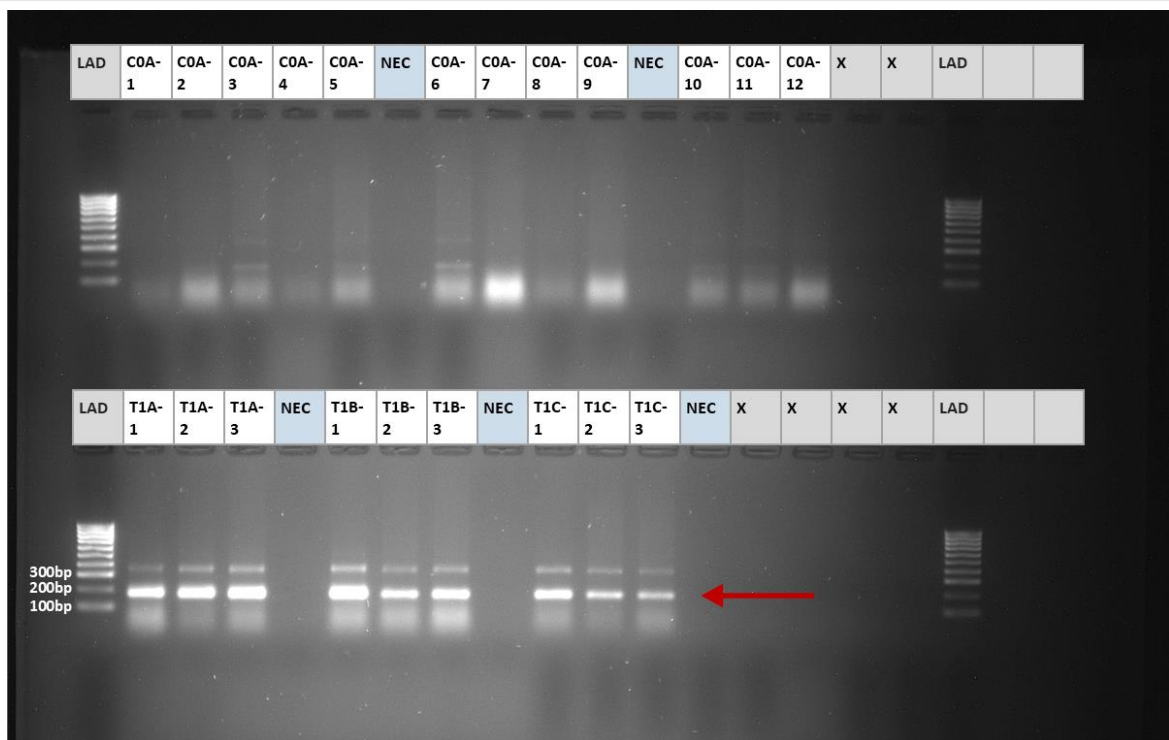

**S2 Fig: Gel electrophoresis image from TBR-PCR screening of UFs in C0-A control trap (top row) and naïve flies in T1 control traps (bottom row). Red arrow indicates target 173bp TBR product. NEC = negative extraction control. LAD = 100bp ladder.**
