# Supplementary material for: Caught in a trap: DNA contamination in tsetse xenomonitoring can lead to over-estimates of Trypanosoma brucei infection
Source: PubMed Central journal article supplement (PMC11341098; doi:10.1371/journal.pntd.0012095), 2024-08-12
Supplement: pntd.0012095.s005.pdf [file pntd.0012095.s005.pdf]

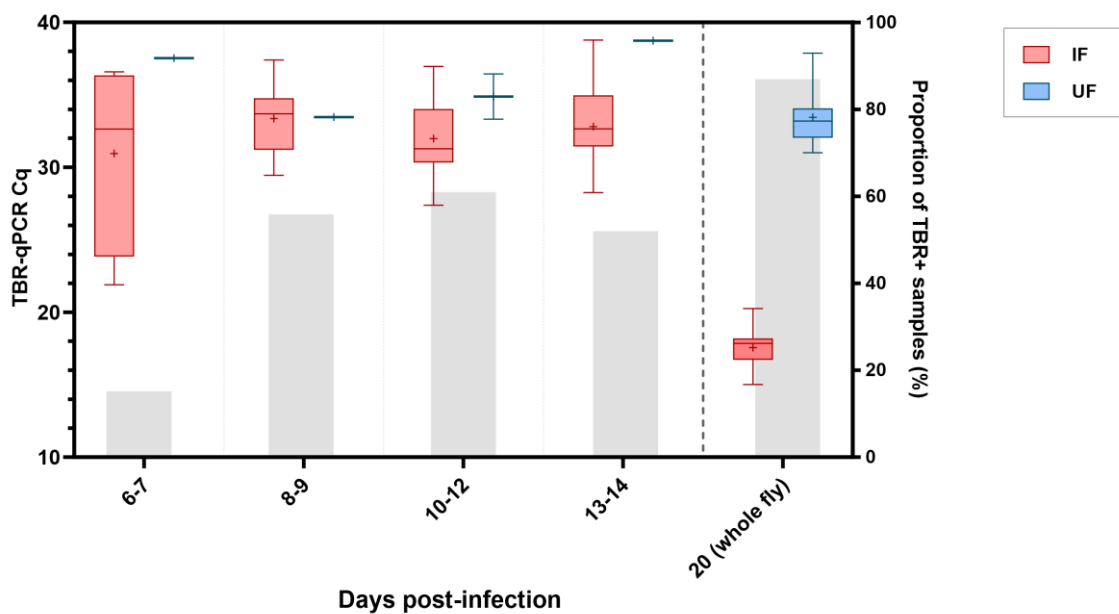

**S3 Fig A:** A box-and-whisker plot (left axis) showing Cq values obtained from TBR-qPCR screening of faecal samples at four timepoints and eventual whole fly DNA from a subset of infected (IF) and refractory uninfected flies (UF) that were subject to dissection ante-mortem (n=44). Samples from infected flies are in red, samples from refractory (uninfected) flies are in blue. The bars (right axis) shows the proportion of faecal samples recording TBR-qPCR amplification (where samples were available). The crosses represent the mean Cq values. The amount of *T. brucei* DNA detected in IF samples was consistently higher than that detected in UFs. Where amplification was recorded, there was a significant difference between mean TBR-qPCR Cq values from infected (mean=17.57) and uninfected whole flies at 20 days (mean=33.54,  $p < 0.0001$ ). The midgut infection rate of this subset was 57% (25/44).

|        | Infected_Y  | Infected_N  |     |     |
|--------|-------------|-------------|-----|-----|
| qPCR_Y | 40          | 4           | 91% | PPV |
| qPCR_N | 5           | 29          | 85% | NPV |
|        | 89%         | 88%         |     |     |
|        | Sensitivity | Specificity |     |     |

**S3 Fig B:** Diagnostic positive predictive value (PPV) and negative predictive value (NPV) calculations for TBR-qPCR screening of tsetse faecal samples as a diagnosis of infection. Faecal samples collected 10-14 days post-inoculation that tested positive (TBR-qPCR) were highly likely to originate from an infected fly, with diagnostic positive predictive value (PPV) of 91% and negative predictive value (NPV) of 85%. A positive TBR-qPCR result ('qPCR\_Y') was any sample recording amplification (Cq < 40). A negative TBR-qPCR result ('TBR-qPCR\_N') was any sample that did not record amplification. Infected ('Infected\_Y') was any fly confirmed as having mature midgut infection by microscopy, whilst uninfected ('Infected\_N') was any fly confirmed as having no visible trypanosome infection by microscopy. Calculations are based on samples collected 10-12 days post-inoculation and/or 13-14 days post-inoculation.
