# Supplementary material for: Caught in a trap: DNA contamination in tsetse xenomonitoring can lead to over-estimates of Trypanosoma brucei infection
Source: PubMed Central journal article supplement (PMC11341098; doi:10.1371/journal.pntd.0012095), 2024-08-12
Supplement: pntd.0012095.s006.pdf [file pntd.0012095.s006.pdf]

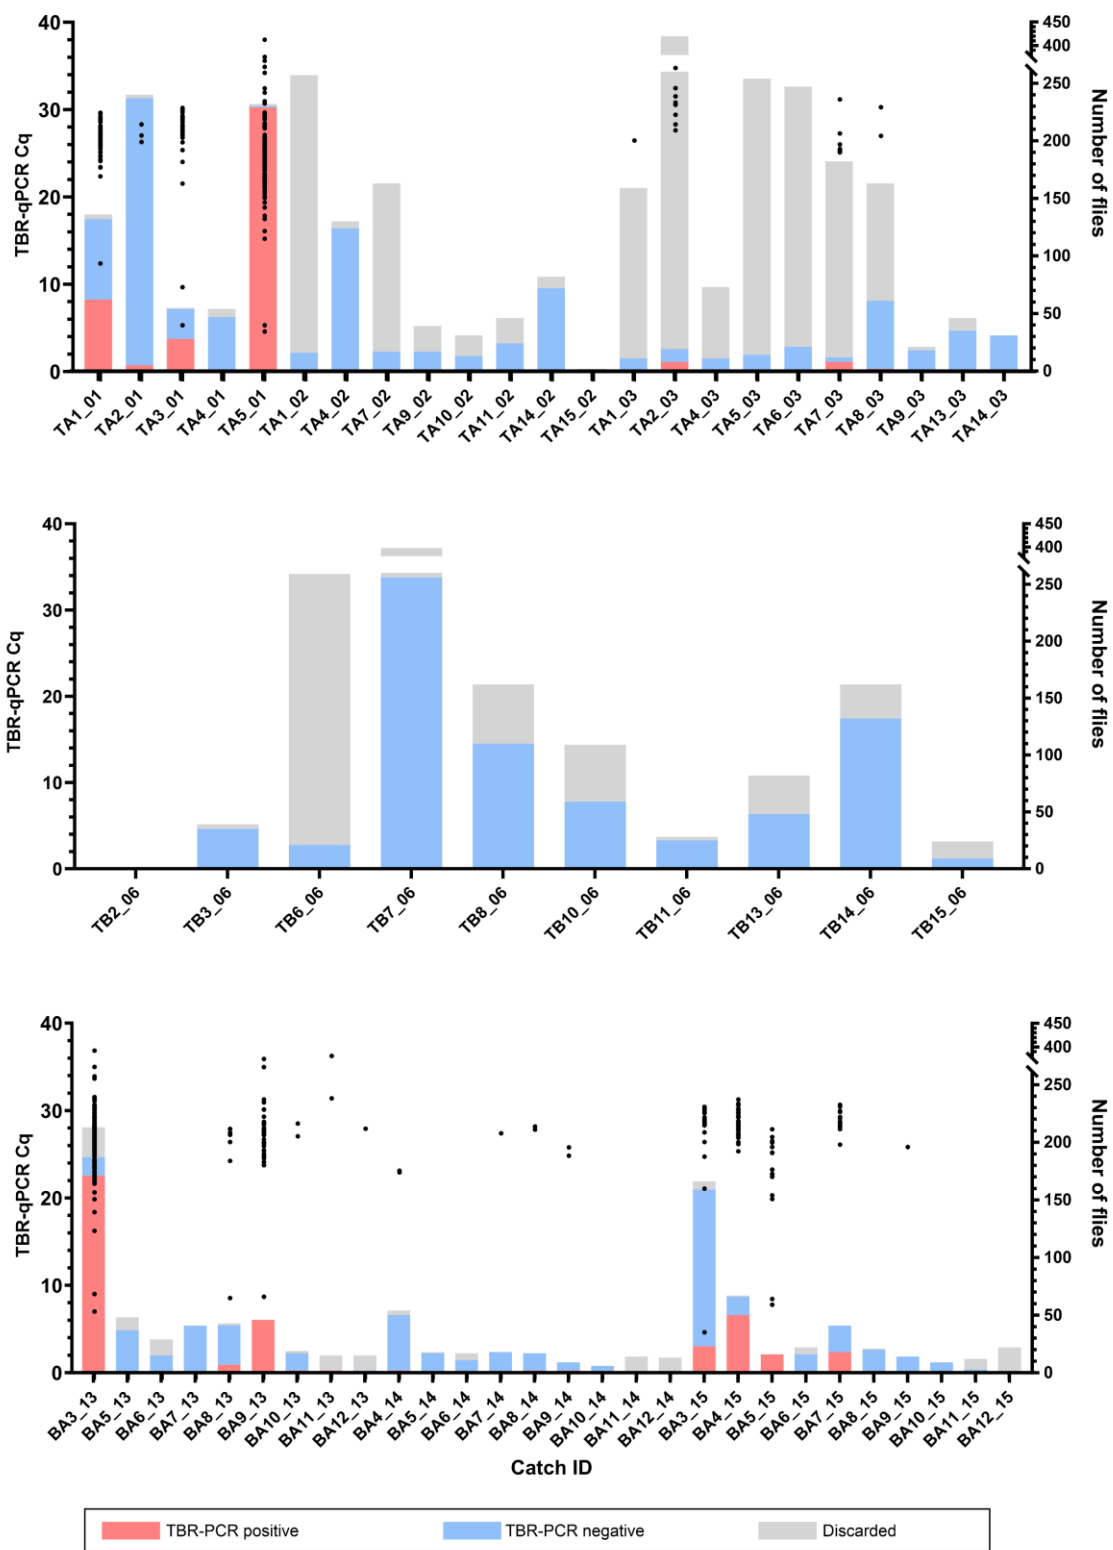

**S4 Fig: Plots displaying total catch counts and respective sample TBR-qPCR Cq values for transects TA, TB and BA\*.** The left Y axis displays individual fly TBR-qPCR Cq values, plotted as black, circular symbols. The right Y axis displays number of flies caught in each catch, displayed as a stacked bar chart. Red shows the number of flies testing TBR-positive, blue shows the number of flies testing TBR negative, and grey shows the number of flies that were discarded and not collected. \*Transect BB is not featured, as it consisted of 1 TBR-negative fly caught in 1 trap (BB17\_15).
